# Supplementary material for: Association between the Plasma-Glycosylated Hemoglobin A1c/High-Density Lipoprotein Cholesterol Ratio and Carotid Atherosclerosis: A Retrospective Study
Source: Hindawi journal article supplement (doi:10.1155/2021/9238566), 2021-11-10
Supplement: f1 [file 9238566.f1.pdf]

1 Association between plasma glycosylated hemoglobin  
 2 A1c/high-density lipoprotein cholesterol ratio and carotid  
 3 atherosclerosis: a retrospective study

4 Supplemental Table 1. Baseline information according to quartiles of HbA1c/HDL-C  
 5 ratio in patients with DM (N=450)

| Characteristics           | HbA1c/HDL-C ratio |                |                |                | P value |
|---------------------------|-------------------|----------------|----------------|----------------|---------|
|                           | Q1 (<5.18)        | Q2 (5.18–6.77) | Q3 (6.77–8.23) | Q4 (>10.73)    |         |
| Number of patients        | 112               | 113            | 113            | 112            |         |
| Age, years                | 66.4 (9.6)        | 65.0 (9.4)     | 64.6 (10.2)    | 62.0 (11.4)    | 0.013   |
| HbA1c, %                  | 6.6 (6.3–7.0)     | 6.8 (6.5–7.3)  | 7.4 (6.9–8.2)  | 8.9 (7.6–9.9)  | <0.001  |
| TG, mmol/L                | 1.5 (0.8)         | 1.9 (2.0)      | 1.8 (1.3)      | 2.1 (1.8)      | 0.015   |
| TC, mmol/L                | 4.9 (1.1)         | 4.5 (1.1)      | 4.3 (1.4)      | 3.9 (1.3)      | <0.001  |
| ApoA, mmol/L <sup>†</sup> | 1.5 (0.3)         | 1.1 (0.2)      | 1.1 (0.2)      | 1.0 (0.2)      | <0.001  |
| ApoB, mmol/L <sup>†</sup> | 0.8 (0.2)         | 0.8 (0.2)      | 0.8 (0.3)      | 0.7 (0.2)      | 0.032   |
| LDL-C, mmol/L             | 2.8 (1.0)         | 2.6 (0.9)      | 2.6 (1.1)      | 2.2 (0.9)      | <0.001  |
| HDL-C, mmol/L             | 1.3 (0.2)         | 1.0 (0.1)      | 0.9 (0.1)      | 0.8 (0.2)      | <0.001  |
| Creatinine, mmol/L        | 85.9 (46.8)       | 97.2 (59.9)    | 91.8 (64.2)    | 114.9 (121.9)  | 0.037   |
| Mean-cIMT, mm             | 1.0 (0.8–1.0)     | 1.0 (0.8–1.1)  | 1.0 (0.9–1.1)  | 1.0 (0.9–1.1)  | 0.001   |
| Maximum cIMT, mm          | 1.0 (0.8–1.1)     | 1.0 (0.9–1.2)  | 1.1 (1.0–1.2)  | 1.1 (1.0–1.2)  | 0.008   |
| Male sex                  | 54 (48.2%)        | 81 (71.7%)     | 76 (67.3%)     | 88 (78.6%)     | <0.001  |
| Smoking                   | 20 (17.9%)        | 42 (37.2%)     | 32 (28.3%)     | 43 (38.4%)     | 0.002   |
| Alcohol consumption       | 6 (5.4%)          | 8 (7.1%)       | 4 (3.5%)       | 4 (3.6%)       | 0.556   |
| Hypertension              | 76 (67.9%)        | 80 (70.8%)     | 74 (65.5%)     | 77 (68.8%)     | 0.860   |
| Carotid plaque score      | 3.4 (0.8–4.7)     | 3.9 (1.6–5.0)  | 3.9 (2.2–5.0)  | 3.7 (1.5–5.1)  | 0.239   |
| Carotid artery plaque     | 84 (75.0%)        | 91 (80.5%)     | 97 (85.8%)     | 88 (78.6%)     | 0.229   |
| WBC, ×10 <sup>9</sup> /L  | 7.3 (2.0)         | 7.9 (2.4)      | 7.8 (2.1)      | 7.9 (2.3)      | 0.156   |
| Fasting blood glucose     | 5.8 (5.2–6.7)     | 6.1 (5.3–7.3)  | 6.9 (5.8–8.6)  | 8.0 (6.3–10.2) | <0.001  |

6 Data were shown as mean ± standard deviation or median (Q1–Q3) or n (%).

7 <sup>†</sup>Missing data were interpolated using the mean value.

8 HbA1c: hemoglobin A1c, HDL-C: high-density lipoprotein cholesterol, TG: triglyceride, TC:  
 9 total cholesterol, ApoA: apolipoprotein A, ApoB: apolipoprotein B, LDL-C: low-density  
 10 lipoprotein cholesterol, cIMT: carotid intima-media thickness, WBC: white blood cells

11 Supplemental Table 2. Baseline information according to quartiles of HbA1c/HDL-C  
 12 ratio in patients without DM (N=854)

| Characteristics           | HbA1c/HDL-C ratio |                |                |               | P value |
|---------------------------|-------------------|----------------|----------------|---------------|---------|
|                           | Q1 (<4.41)        | Q2 (4.41–5.23) | Q3 (5.23–6.38) | Q4 (>6.38)    |         |
| Number of patients        | 213               | 214            | 214            | 213           |         |
| Age, years                | 64.1 (10.2)       | 62.9 (10.7)    | 60.4 (10.8)    | 61.9 (11.1)   | 0.003   |
| HbA1c, %                  | 5.6 (5.4–5.9)     | 5.7 (5.4–6.0)  | 5.8 (5.6–6.1)  | 5.9 (5.7–6.1) | <0.001  |
| TG, mmol/L                | 1.2 (0.8)         | 1.4 (0.7)      | 1.6 (0.9)      | 1.8 (1.4)     | <0.001  |
| TC, mmol/L                | 5.0 (1.3)         | 4.7 (1.1)      | 4.5 (1.3)      | 4.0 (1.1)     | <0.001  |
| ApoA, mmol/L <sup>†</sup> | 1.6 (0.3)         | 1.3 (0.2)      | 1.1 (0.2)      | 0.9 (0.2)     | <0.001  |
| ApoB, mmol/L <sup>†</sup> | 0.8 (0.3)         | 0.8 (0.2)      | 0.8 (0.3)      | 0.8 (0.2)     | 0.102   |
| LDL-C, mmol/L             | 2.8 (1.1)         | 2.8 (1.0)      | 2.7 (1.2)      | 2.4 (0.9)     | <0.001  |
| HDL-C, mmol/L             | 1.5 (0.2)         | 1.2 (0.1)      | 1.0 (0.1)      | 0.8 (0.1)     | <0.001  |
| Creatinine, mmol/L        | 77.5 (22.6)       | 83.3 (25.2)    | 87.1 (35.3)    | 102.0 (61.1)  | <0.001  |
| Mean-cIMT, mm             | 0.9 (0.8–1.0)     | 0.9 (0.8–1.0)  | 0.9 (0.8–1.0)  | 1.0 (0.8–1.1) | 0.026   |
| Maximum cIMT, mm          | 1.0 (0.8–1.1)     | 1.0 (0.8–1.1)  | 1.0 (0.8–1.1)  | 1.0 (0.9–1.1) | 0.025   |
| Male sex                  | 107 (50.2%)       | 148 (69.2%)    | 156 (72.9%)    | 187 (87.8%)   | <0.001  |
| Smoking                   | 58 (27.2%)        | 66 (30.8%)     | 81 (37.9%)     | 94 (44.1%)    | 0.001   |
| Alcohol consumption       | 9 (4.2%)          | 19 (8.9%)      | 14 (6.5%)      | 17 (8.0%)     | 0.251   |
| Hypertension              | 101 (47.4%)       | 116 (54.2%)    | 119 (55.6%)    | 124 (58.2%)   | 0.141   |
| Carotid plaque score      | 2.3 (0.0–4.4)     | 3.2 (0.2–4.5)  | 3.0 (0.0–4.3)  | 3.6 (1.6–4.8) | 0.004   |
| Carotid artery plaque     | 144 (67.6%)       | 160 (74.8%)    | 147 (68.7%)    | 172 (80.8%)   | 0.007   |
| WBC, ×10 <sup>9</sup> /L  | 7.0 (2.2)         | 7.1 (1.9)      | 7.5 (2.3)      | 7.7 (2.3)     | 0.004   |
| Fasting blood glucose     | 4.9 (4.6–5.3)     | 5.0 (4.6–5.5)  | 5.0 (4.7–5.6)  | 5.0 (4.7–5.6) | 0.021   |

13 Data were shown as mean ± standard deviation or median (Q1–Q3) or n (%).

14 <sup>†</sup>Missing data were interpolated using the mean value.

15 HbA1c: hemoglobin A1c, HDL-C: high-density lipoprotein cholesterol, TG: triglyceride, TC:  
 16 total cholesterol, ApoA: apolipoprotein A, ApoB: apolipoprotein B, LDL-C: low-density  
 17 lipoprotein cholesterol, cIMT: carotid intima-media thickness, WBC: white blood cells

18 Supplemental Table 3. Subgroup analysis of abnormal cIMT or carotid artery plaque  
 19 in prespecified and exploratory subgroups

| Abnormal mean cIMT |                   |                |                |               |                   |
|--------------------|-------------------|----------------|----------------|---------------|-------------------|
| Subgroups          | HbA1c/HDL-C ratio |                |                |               | P for interaction |
|                    | Q1 (<4.78)        | Q2 (4.78–5.85) | Q3 (5.85–7.30) | Q4 (>7.30)    |                   |
| Age ≥ 65 years     |                   |                |                |               | 0.860             |
| Yes                | Ref.              | 1.1 (0.7–1.8)  | 1.7 (1.1–2.7)  | 2.6 (1.6–4.2) |                   |
| No                 | Ref.              | 1.2 (0.8–1.8)  | 1.4 (0.9–2.1)  | 2.7 (1.7–4.2) |                   |

|                       |      |               |               |                |       |
|-----------------------|------|---------------|---------------|----------------|-------|
| Sex                   |      |               |               |                | 0.983 |
| Male                  | Ref. | 1.1 (0.8–1.7) | 1.4 (0.9–2.0) | 2.4 (1.6–3.6)  |       |
| Female                | Ref. | 0.9 (0.6–1.6) | 1.3 (0.8–2.3) | 1.3 (0.8–2.3)  |       |
| Smoking               |      |               |               |                | 0.210 |
| Yes                   | Ref. | 1.1 (0.6–1.9) | 1.2 (0.7–2.0) | 2.0 (1.1–3.4)  |       |
| No                    | Ref. | 1.1 (0.8–1.6) | 1.5 (1.0–2.2) | 2.8 (1.9–4.2)  |       |
| Alcohol consumption   |      |               |               |                | 0.941 |
| Yes                   | Ref. | 1.9 (0.5–6.4) | 1.2 (0.4–4.2) | 3.9 (0.9–17.6) |       |
| No                    | Ref. | 1.1 (0.8–1.5) | 1.4 (1.0–2.0) | 2.5 (1.8–3.5)  |       |
| Hypertension          |      |               |               |                | 0.683 |
| Yes                   | Ref. | 0.9 (0.6–1.4) | 1.3 (0.9–2.0) | 2.1 (1.4–3.3)  |       |
| No                    | Ref. | 1.3 (0.8–2.1) | 1.3 (0.8–2.2) | 2.7 (1.7–4.5)  |       |
| Abnormal maximum cIMT |      |               |               |                |       |
| Age $\geq$ 65 years   |      |               |               |                | 0.654 |
| Yes                   | Ref. | 1.1 (0.7–1.8) | 1.9 (1.1–3.1) | 2.9 (1.7–4.9)  |       |
| No                    | Ref. | 1.3 (0.8–2.0) | 1.4 (0.9–2.2) | 3.7 (2.3–5.9)  |       |
| Sex                   |      |               |               |                | 0.713 |
| Male                  | Ref. | 1.1 (0.7–1.6) | 1.4 (0.9–2.0) | 2.9 (1.9–4.4)  |       |
| Female                | Ref. | 1.2 (0.7–2.0) | 1.4 (0.8–2.5) | 3.5 (1.8–6.6)  |       |
| Smoking               |      |               |               |                | 0.713 |
| Yes                   | Ref. | 1.1 (0.6–2.0) | 1.3 (0.8–2.4) | 2.9 (1.6–5.3)  |       |
| No                    | Ref. | 1.2 (0.8–1.7) | 1.5 (1.0–2.2) | 3.3 (2.2–5.0)  |       |
| Alcohol consumption   |      |               |               |                | 0.981 |
| Yes                   | Ref. | 1.8 (0.5–6.0) | 1.9 (0.5–6.4) | 3.1 (0.7–13.8) |       |
| No                    | Ref. | 1.1 (0.8–1.6) | 1.5 (1.1–2.0) | 3.2 (2.3–4.6)  |       |
| Hypertension          |      |               |               |                | 0.766 |
| Yes                   | Ref. | 1.1 (0.7–1.7) | 1.6 (1.0–2.5) | 2.9 (1.9–4.7)  |       |
| No                    | Ref. | 1.1 (0.7–1.8) | 1.2 (0.7–1.8) | 3.1 (1.8–5.2)  |       |
| Carotid artery plaque |      |               |               |                |       |
| Age $\geq$ 65 years   |      |               |               |                | 0.206 |
| Yes                   | Ref. | 1.1 (0.6–2.0) | 1.8 (0.9–3.4) | 1.7 (0.9–3.1)  |       |
| No                    | Ref. | 1.5 (1.0–2.3) | 1.7 (1.1–2.6) | 3.4 (2.1–5.5)  |       |
| Sex                   |      |               |               |                | 0.510 |
| Male                  | Ref. | 1.1 (0.7–1.7) | 1.4 (0.9–2.2) | 2.1 (1.3–3.4)  |       |
| Female                | Ref. | 1.4 (0.8–2.4) | 1.6 (0.9–2.9) | 2.9 (1.4–6.0)  |       |
| Smoking               |      |               |               |                | 0.476 |
| Yes                   | Ref. | 1.1 (0.6–2.1) | 1.5 (0.8–3.0) | 1.8 (0.9–3.6)  |       |
| No                    | Ref. | 1.3 (0.9–1.9) | 1.5 (1.0–2.2) | 2.7 (1.7–4.4)  |       |
| Alcohol consumption   |      |               |               |                | 0.336 |
| Yes                   | Ref. | 0.1 (0.0–1.3) | 0.2 (0.0–2.2) | 0.8 (0.0–13.4) |       |
| No                    | Ref. | 1.3 (1.0–1.9) | 1.6 (1.1–2.3) | 2.6 (1.8–3.8)  |       |
| Hypertension          |      |               |               |                | 0.921 |
| Yes                   | Ref. | 1.1 (0.7–1.9) | 1.4 (0.8–2.3) | 2.2 (1.3–3.7)  |       |
| No                    | Ref. | 1.2 (0.8–1.9) | 1.4 (0.9–2.4) | 2.3 (1.3–4.0)  |       |

- 20 Data were shown as OR (95%CI).
- 21 cIMT: carotid intima-media thickness, HbA1c: hemoglobin Alc, HDL-C: high-density
- 22 lipoprotein cholesterol
